# Supplementary material
Source: publisher figshare collection journal article supplement (https://gsapubs.figshare.com/ndownloader/files/22745714)
Supplement: Supplementary file 1 [file 22745714]

## Data Repository Item 2004072

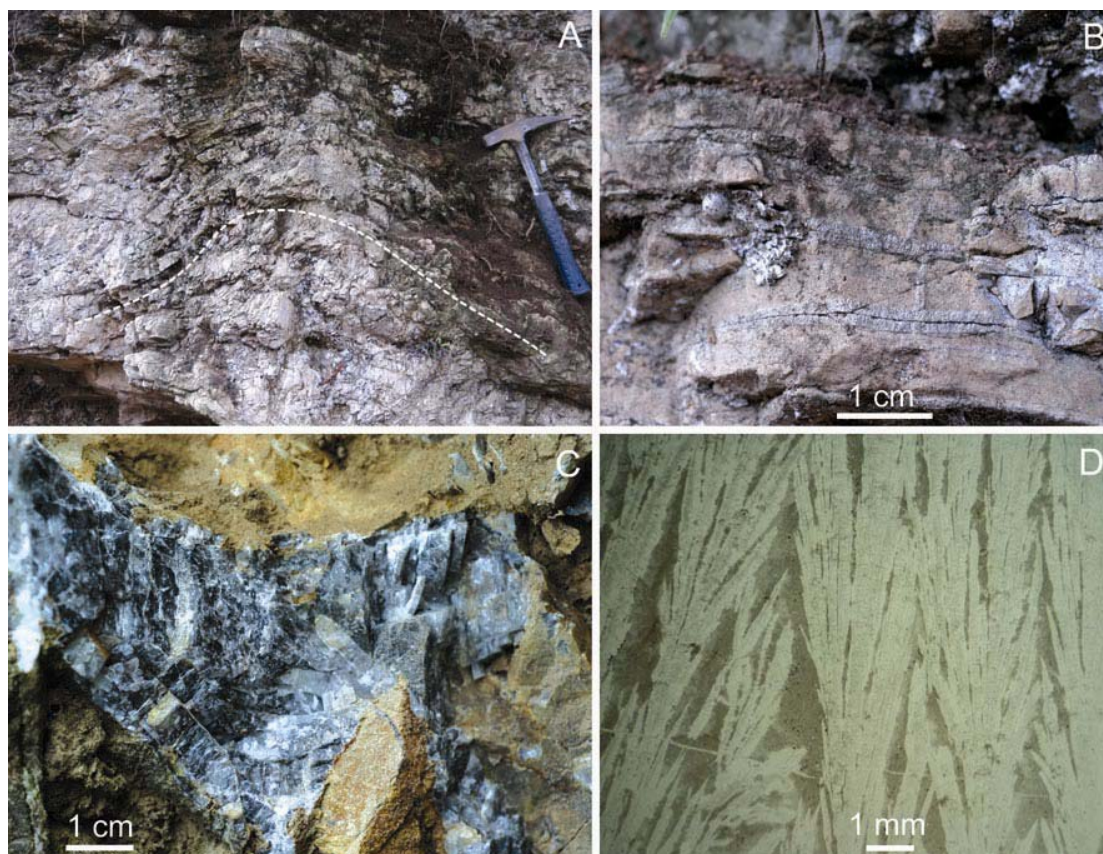

Fig. DR1. (A) Tepee-like structure near the base of Doushantuo cap dolomite, Songlin, central Guizhou Province. Dashed line traces a bedding plane. Sheet cracks are also present in tepee-like structures, but are not readily visible at this magnification. (B) A magnified view of horizontal (and rarely vertical) sheet cracks filled with quartz crystals. (C) Barite precipitates about 2 meters above the base of Doushantuo cap dolomite at Wuhe, eastern Guizhou Province. (D) Barite crystal fans about 1.2 meters from the base of Doushantuo cap dolomite, Baokang, northern Hubei Province.

Table DR1. Stratigraphic height (SH, in meters),  $\delta^{13}\text{C}$  (‰, VPDB), and  $\delta^{18}\text{O}$  (‰, VPDB) of measured Doushantuo cap carbonate samples.  $\text{CO}_2$  was extracted using standard offline technique, after reaction with concentrated  $\text{H}_3\text{PO}_4$  at  $25^\circ\text{C}$  for 12 hours.  $\delta^{13}\text{C}$  and  $\delta^{18}\text{O}$  were measured on a Finnigan MAT 251 mass spectrometer. Analytical precision is better than 0.1‰ for  $\delta^{13}\text{C}$  and 0.3‰ for  $\delta^{18}\text{O}$ .

| Songlin section, central Guizhou |     |                       |                       | Jingquandun section, Yangtze Gorges    |      |                       |                       | Lantian section, S. Anhui |      |                       |                       |
|----------------------------------|-----|-----------------------|-----------------------|----------------------------------------|------|-----------------------|-----------------------|---------------------------|------|-----------------------|-----------------------|
| Sample #                         | SH  | $\delta^{13}\text{C}$ | $\delta^{18}\text{O}$ | Sample #                               | SH   | $\delta^{13}\text{C}$ | $\delta^{18}\text{O}$ | Sample #                  | SH   | $\delta^{13}\text{C}$ | $\delta^{18}\text{O}$ |
| 01ZS-41                          | 0.0 | −3.0                  | −7.5                  | 1-a                                    | 0.0  | −2.4                  | −5.9                  | LTD-02                    | 0.00 | −3.6                  | −8.8                  |
| 01ZS-42                          | 0.2 | −3.2                  | −8.5                  | 1-b                                    | 0.1  | −2.5                  | −6.1                  | LTD-03                    | 0.07 | −4.2                  | −7.7                  |
| 01ZS-43                          | 0.5 | −3.2                  | −7.4                  | 1-c                                    | 0.3  | −2.4                  | −6.2                  | LTD-04                    | 0.14 | −4.2                  | −8.6                  |
| 01ZS-44                          | 0.7 | −3.0                  | −7.7                  | 2-a                                    | 0.4  | −2.3                  | −6                    | LTD-05                    | 0.21 | −4.7                  | −8.3                  |
| 01ZS-45                          | 1.0 | −2.8                  | −7.1                  | 2-b                                    | 0.6  | −2.5                  | −6.1                  | LTD-06                    | 0.28 | −3.9                  | −10.2                 |
| 01ZS-46                          | 1.2 | −3.7                  | −8.4                  | 2-c                                    | 0.7  | −2.6                  | −6.6                  | LTD-07                    | 0.35 | −4.4                  | −8.6                  |
| 01ZS-47                          | 1.4 | −2.6                  | −7.1                  | 3-a                                    | 0.8  | −2.5                  | −6.2                  | LTD-08                    | 0.42 | −4.3                  | −10.2                 |
| 01ZS-48                          | 1.7 | −3.4                  | −8.0                  | 3-b                                    | 1.0  | −2.92                 | −6.2                  | LTD-09                    | 0.49 | −4.5                  | −8.3                  |
| 01ZS-49                          | 1.9 | −3.7                  | −8.6                  | 4-a                                    | 1.1  | −2.9                  | −7.1                  | LTD-10                    | 0.56 | −5                    | −8.8                  |
| 01ZS-50                          | 2.2 | −3.3                  | −8.5                  | 4-b                                    | 1.3  | −2.9                  | −7.2                  | LTD-11                    | 0.63 | −5                    | −8.9                  |
| 01ZS-51                          | 2.4 | −3.1                  | −8.1                  | 5-a                                    | 1.4  | −3.1                  | −6.8                  | LTD-12                    | 0.70 | −5.2                  | −8                    |
| 01ZS-52                          | 2.6 | −3.1                  | −7.2                  | 5-b                                    | 1.5  | −3.1                  | −6.9                  | LTD-13                    | 0.77 | −5                    | −8.3                  |
| 01ZS-53                          | 2.9 | −3.0                  | −7.4                  | 6-a                                    | 1.7  | −2.9                  | −6.5                  | LTD-14                    | 0.84 | −4.9                  | −8.4                  |
| 01ZS-54                          | 3.1 | −3.3                  | −7.3                  | 6-b                                    | 1.8  | −2.6                  | −6.8                  | LTD-15                    | 0.91 | −5                    | −8.4                  |
| 01ZS-55                          | 3.4 | −3.2                  | −7.5                  | 7                                      | 2.0  | −3.2                  | −6.7                  | LTD-16                    | 0.98 | −5.1                  | −7.9                  |
| 01ZS-56                          | 3.6 | −4.1                  | −8.0                  | 8-a                                    | 2.1  | −0.7                  | −4.2                  | LTD-17                    | 1.05 | −5.1                  | −8.1                  |
| 01ZS-57                          | 3.8 | −3.8                  | −7.7                  | 8-b                                    | 2.2  | −1                    | −6.8                  | LTD-18                    | 1.12 | −5.2                  | −7.6                  |
| 01ZS-58                          | 4.1 | −4.5                  | −9.7                  | 9-a                                    | 2.4  | −1.2                  | −4.4                  | LTD-19A                   | 1.19 | −4.9                  | −7.9                  |
| 01ZS-59                          | 4.3 | −4.3                  | −10.0                 | 9-b                                    | 2.5  | −3.4                  | −13.3                 | LTD-19B                   | 1.26 | −5                    | −6.8                  |
| 01ZS-60                          | 4.6 | −4.5                  | −9.5                  | 12                                     | 2.7  | −2.8                  | −15.6                 | LTD-20A                   | 1.33 | −4.8                  | −9.5                  |
| 01ZS-61                          | 4.8 | −3.9                  | −7.8                  | 13-a                                   | 2.8  | −1.1                  | −4.6                  | LTD-20B                   | 1.40 | −5.1                  | −7.3                  |
| 01ZS-62                          | 5.0 | −4.6                  | −9.2                  | 14-a                                   | 2.9  | −3.9                  | −13.1                 | LTD-21                    | 1.47 | −5.4                  | −8.8                  |
| 01ZS-63                          | 5.3 | −4.0                  | −8.4                  | 14-b                                   | 3.1  | −3.7                  | −10.1                 | LTD-22                    | 1.54 | −4.7                  | −11                   |
| 01ZS-64                          | 5.5 | −4.3                  | −8.8                  | 15-a                                   | 3.2  | −2.6                  | −10.8                 | LTD-23                    | 1.61 | −5                    | −8.3                  |
| 01ZS-65                          | 5.8 | −4.0                  | −7.6                  | 15b-a                                  | 3.4  | −2.6                  | −11.6                 | LTD-24                    | 1.68 | −5                    | −9.9                  |
| 01ZS-67                          | 6.0 | −4.3                  | −8.1                  | 15b-b                                  | 3.5  | −3.6                  | −8.2                  |                           |      |                       |                       |
| 01ZS-69                          | 6.2 | −4.3                  | −8.1                  | 16                                     | 3.6  | −2.4                  | −10.9                 |                           |      |                       |                       |
| 01ZS-71                          | 6.5 | −4.4                  | −7.9                  | 17-a                                   | 3.8  | −3.2                  | −6.7                  |                           |      |                       |                       |
| 01ZS-72                          | 6.7 | −4.4                  | −8.2                  | 17-b                                   | 3.9  | −3                    | −7.6                  |                           |      |                       |                       |
| 01ZS-73                          | 7.0 | −5.7                  | −8.6                  | 17-c                                   | 4.1  | −3.1                  | −6.8                  |                           |      |                       |                       |
| 01ZS-74                          | 7.2 | −4.4                  | −8.0                  | 18                                     | 4.2  | −4.3                  | −9.8                  |                           |      |                       |                       |
| 01ZS-75                          | 7.4 | −4.4                  | −7.4                  | 19                                     | 4.3  | −5.8                  | −7.2                  |                           |      |                       |                       |
| 01ZS-76                          | 7.7 | −4.6                  | −8.9                  |                                        |      |                       |                       |                           |      |                       |                       |
| 01ZS-77                          | 7.9 | −5.1                  | −9.0                  |                                        |      |                       |                       |                           |      |                       |                       |
| 01ZS-77+                         | 8.2 | −5.3                  | −10.9                 | <b>Baokang section, northern Hubei</b> |      |                       |                       |                           |      |                       |                       |
|                                  |     |                       |                       | Sample #                               | SH   | $\delta^{13}\text{C}$ | $\delta^{18}\text{O}$ |                           |      |                       |                       |
| 01ZS-78                          | 8.4 | −4.8                  | −9.4                  | OB-1                                   | 0.15 | −0.9                  | −3.8                  |                           |      |                       |                       |
| 01ZS-79                          | 8.6 | −5.0                  | −8.6                  | OB--2                                  | 0.55 | −1.9                  | −5.4                  |                           |      |                       |                       |
| 01ZS-80                          | 8.9 | −4.6                  | −7.5                  | OB--3                                  | 0.75 | −2.0                  | −5.6                  |                           |      |                       |                       |
| 01ZS-81                          | 9.1 | −4.1                  | −7.7                  | OB--4                                  | 1.1  | −2.4                  | −6.7                  |                           |      |                       |                       |
| 01ZS-82                          | 9.4 | −4.1                  | −7.6                  | OB--5                                  | 1.25 | −2.1                  | −5.0                  |                           |      |                       |                       |
| 01ZS-83                          | 9.6 | −5.5                  | −8.4                  | OB--6                                  | 1.5  | −0.6                  | −2.6                  |                           |      |                       |                       |
| 01ZS-84                          | 9.8 | −5.0                  | −8.6                  |                                        |      |                       |                       |                           |      |                       |                       |

Table DR2. U-Pb Isotope Dilution Analyses, Datangpo Volcanic Ash.

| Fractions |                 |             | Concentrations     |            |                   |              | Atomic ratios                              |                                            |    |                                             |    | Age [Ma]                                  |    |                                            |      |
|-----------|-----------------|-------------|--------------------|------------|-------------------|--------------|--------------------------------------------|--------------------------------------------|----|---------------------------------------------|----|-------------------------------------------|----|--------------------------------------------|------|
| No        | Properties      | Wt.<br>[μg] | Pb<br>rad<br>[ppm] | U<br>[ppm] | Pb<br>com<br>[pg] | Th<br>—<br>U | <sup>206</sup> Pb<br><br><sup>204</sup> Pb | <sup>207</sup> Pb<br><br><sup>206</sup> Pb |    | <sup>207</sup> Pb<br><br>± <sup>235</sup> U |    | <sup>206</sup> Pb<br><br><sup>238</sup> U |    | <sup>207</sup> Pb<br><br><sup>206</sup> Pb | ±    |
|           | (1)             | (2)         | (2)                | (2)        | (3)               | (4)          | (5)                                        | (6)                                        |    | (6)                                         |    | (6)                                       |    | (6)                                        |      |
| ZLG-5     |                 |             |                    |            |                   |              |                                            |                                            |    |                                             |    |                                           |    |                                            |      |
| 1         | 5, Z, cl, c,n,A | 12          | 16.6               | 124        | 2.2               | 1.26         | 4,569                                      | 0.06160                                    | 11 | 0.9001                                      | 21 | 0.10597                                   | 17 | 660.4                                      | 3.8  |
| 2         | 4, Z, cl,c,n, A | 15          | 12.9               | 92.5       | 2.2               | 1.45         | 4,289                                      | 0.06164                                    | 20 | 0.8997                                      | 33 | 0.10585                                   | 16 | 661.8                                      | 7.0  |
| 3         | 5, Z,cl,c,n, A  | 14          | 21.8               | 163        | 3.3               | 1.37         | 4,575                                      | 0.06180                                    | 7  | 0.9046                                      | 16 | 0.10616                                   | 16 | 667.3                                      | 2.5  |
| 4         | 4, Z, cl,c,n, A | 11          | 10.3               | 94.6       | 3.7               | 1.21         | 1,571                                      | 0.06153                                    | 17 | 0.7361                                      | 22 | 0.08677                                   | 11 | 657.9                                      | 5.8  |
| 5         | 5, Z,cl,c,n, A  | 16          | 11.2               | 79.6       | 3.3               | 1.43         | 2,617                                      | 0.06153                                    | 12 | 0.9075                                      | 21 | 0.10697                                   | 15 | 657.9                                      | 4.0  |
| 6         | 2, Z, cl,c,n, A | 5           | 11.8               | 89.8       | 2.4               | 1.37         | 1,269                                      | 0.06151                                    | 31 | 0.8605                                      | 47 | 0.10146                                   | 16 | 657.2                                      | 10.9 |

Notes:

- (1) Z = zircon. Cardinal number indicates the number of mineral grains analyzed (e.g. 2 grains); all mineral grains were selected from non-paramagnetic separates at 0° tilt at full magnetic field in Frantz magnetic Separator; < 75 μm); c = colorless; cl = clear; n = needles; A = air-abraded following Krogh (1973, 1982).
- (2) Concentrations are known to ± 30% for sample weights of about 30 μg and ± 50% for samples < 3 μg.
- (3) Corrected for 0.0125 mole fraction common-Pb in the <sup>205</sup>Pb – <sup>235</sup>U spike.
- (4) Calculated Th/U ratio assuming that all <sup>208</sup>Pb in excess of blank, common-Pb, and spike is radiogenic ( $\lambda^{232}\text{Th} = 4.9475 \times 10^{-11} \text{ y}^{-1}$ ).
- (5) Measured, uncorrected ratio.
- (6) Ratio corrected for fractionation, spike, blank, and initial common-Pb (at the determined age from Stacey and Kramers, 1975). Pb fractionation correction = 0.094% / amu (± 0.025%, 1σ); U fractionation correction = 0.111% / amu (± 0.02% 1σ). U blank = 0.2 pg; Pb blank ≤ 10 pg. Absolute uncertainties (1σ) in the Pb/U and <sup>207</sup>Pb/<sup>206</sup>Pb ratios calculated following Ludwig (1980). U and Pb half-lives and isotopic abundance ratios from Jaffey et al. (1971).

Laboratory procedures:

The separation of Pb and U and the analytical techniques employing a <sup>205</sup>Pb-<sup>235</sup>U tracer solution are those described in Krogh (1973, 1982) with modification outlined in Tucker et al. (1990). Isotope ratio measurements of U and Pb were performed at Washington University, St. Louis, in a Sector 54 thermal ionization mass spectrometer, equipped with a Daly type pulse counting ion detector by the method of peak hopping. Calibration of instrument performance and mass fractionation were done periodically with reference to NIST (National Institute of Standards and Technology) and CBNM (Central Bureau for Nuclear Measurement) standard materials. The isotopic concentration of the laboratory background (typically between 2-4 pg for Pb and U) was measured routinely and used in calculating the U-Pb age of the unknown samples. A measure of background contamination is reflected in the low sample weights, 5-16 micrograms, high uncorrected <sup>206</sup>Pb/<sup>204</sup>Pb ratios, and low common Pb contents. Isotopic ages were calculated using the half-lives and isotope abundance ratios given by Jaffey et al. (1971) and common-Pb isotope ratios (at 663 Ma) given by Stacey and Kramers (1975).

## REFERENCES CITED:

Jaffey, A.F., Flynn, K.F., Glendenin, L.E., Bentley, W.C., and Essling, A.M., 1971, Precision measurement of half-lives and specific activities of <sup>235</sup>U and <sup>238</sup>U: Physics Review Section C, Nuclear Physics, v. 4, p.

1889-1906.

- Krogh, T.E., 1973, A low-contamination method for hydrothermal decomposition of zircon and extraction of U and Pb for isotopic age determinations: *Geochimica et Cosmochimica Acta*, v. 37, p. 485-494.
- Krogh, T.E., 1982, Improved accuracy of U-Pb zircon ages by the creation of more concordant systems using air abrasion technique: *Geochimica et Cosmochimica Acta*, v. 46, p. 637-649.
- Ludwig, K.R., 1980, Calculation of uncertainties of U-Pb isotope data: *Earth and Planetary Science Letters*, v. 46, p. 212-220.
- Stacey, J.S., and Kramers, J.D., 1975, Approximation of terrestrial lead isotope evolution by a two-stage model: *Earth and Planetary Science Letters*, v. 26, p. 207-221.
- Tucker, R.D., Krogh, T.E., and Raheim, A., 1990, Proterozoic evolution and age-province boundaries in the central part of the Western Gneiss region, Norway: Results of U-Pb dating of accessory minerals from Trondheimsfjord to Geiranger, *in* Gower, C.F., Rivers, T., and Ryan, B., eds., *Mid-Proterozoic Laurentia-Baltica*, Geological Association of Canada Special Paper 38: Toronto, ON, Canada, Geological Association of Canada, p. 149-173.
